# Supplementary material for: Development of a Nutrition Questionnaire for Dental Caries Risk Factors
Source: PubMed Central journal article supplement (PMC7084613; doi:10.3390/ijerph17051793), 2020-03-10
Supplement: ijerph-17-01793-s001.pdf [file ijerph-17-01793-s001.pdf]

**Figure S1: Final Questionnaire**

Note: #10 omitted in clinic sample; #15 omitted in campus sample.

Please select the answer that best describes your habits on **most days** over the **past 3 months**.  
Parents/caregivers – if completing this form for a child, answer from the child's perspective.

1. Each day, when do you usually have **drinks**, including smoothies? (Check all that apply)

**Do not include** water, unsweetened black coffee or tea, or other zero-calorie drinks.

- Breakfast
- Morning snack
- Other times (please specify): \_\_\_\_\_
- Lunch
- Afternoon snack
- Evening meal
- Evening snack

2. Each day, when do you usually have **food**? (Check all that apply)

- Breakfast
- Morning snack
- Other times (please specify): \_\_\_\_\_
- Lunch
- Afternoon snack
- Evening meal
- Evening snack

3. When do you usually eat **sugary or sweet foods** such as cereals, cookies, cakes, baked goods, chocolate bars, fruit in syrup, or other sugary foods? (Check all that apply)

- Breakfast
- Morning snack
- Other times (please specify): \_\_\_\_\_
- Lunch
- Afternoon snack
- Evening meal
- Evening snack
- Rarely or never

4. How often do you usually **drink** each of the following? (Please specify a number if indicated)

- Juice (100% juice or other fruit drinks)**     Rarely or never     A few times per week: \_\_\_\_\_     Once per day     More than once per day: \_\_\_\_\_
- Pop/Soda (regular or reduced-sugar but not diet or zero-calorie)**     Rarely or never     A few times per week: \_\_\_\_\_     Once per day     More than once per day: \_\_\_\_\_

**Other sugary drinks (iced tea, sports or energy drinks, sweetened iced coffee, iced cappuccinos, etc.)**     Rarely or never     A few times per week: \_\_\_\_\_     Once per day     More than once per day: \_\_\_\_\_

5. Do you add sugar to **food or drinks**?

**Include:** white or brown sugar, molasses, honey, agave, other natural or processed syrup, and other natural sugars such as cane, coconut or palm sugar.

**Do not include** calorie-free sweeteners such as aspartame, stevia or sucralose.

- No
- Yes – how many teaspoons (or packets) do you usually add per day? \_\_\_\_\_

6. Do you **chew** sugary gum, or **eat** any of the following: dried fruit, chewy fruit snacks, sugary candies (gummy or hard), breath mints or throat lozenges?

- No
- Yes – how often do you have **at least one** of the above items?
  - A few times per month or less     A few times per week     Once per day     More than once per day

7. How many **servings** of vegetables and fruits do you eat each day? (Select the closest answer)

One serving of vegetables is ½ cup of fresh, frozen or cooked vegetables, ½ cup of cooked greens or 1 cup of raw **leafy** greens.

One serving of fruit is one whole piece of fruit or ½ a cup of chopped or frozen fruit (**not fruit juice or juice canned in syrup**).

|                   |                            |                            |                            |                            |                            |                                    |
|-------------------|----------------------------|----------------------------|----------------------------|----------------------------|----------------------------|------------------------------------|
| <b>Vegetables</b> | <input type="checkbox"/> 0 | <input type="checkbox"/> 1 | <input type="checkbox"/> 2 | <input type="checkbox"/> 3 | <input type="checkbox"/> 4 | <input type="checkbox"/> 5 or more |
| <b>Fruit</b>      | <input type="checkbox"/> 0 | <input type="checkbox"/> 1 | <input type="checkbox"/> 2 | <input type="checkbox"/> 3 | <input type="checkbox"/> 4 | <input type="checkbox"/> 5 or more |

8. How often do you usually drink the following types of **milk**? (Please specify a number if indicated)

**Include** milk that you have with cereal.

|                                                                           |                                             |                                                         |                                          |                                                              |
|---------------------------------------------------------------------------|---------------------------------------------|---------------------------------------------------------|------------------------------------------|--------------------------------------------------------------|
| <b>Plain cow's milk<br/>(white, any fat<br/>content)</b>                  | <input type="checkbox"/> Rarely<br>or never | <input type="checkbox"/> A few times per<br>week: _____ | <input type="checkbox"/> Once<br>per day | <input type="checkbox"/> More than once<br>per day:<br>_____ |
| <b>Flavored cow's milk<br/>(chocolate, vanilla,<br/>strawberry, etc.)</b> | <input type="checkbox"/> Rarely<br>or never | <input type="checkbox"/> A few times per<br>week: _____ | <input type="checkbox"/> Once<br>per day | <input type="checkbox"/> More than once<br>per day:<br>_____ |
| <b>Soy milk (any type)</b>                                                | <input type="checkbox"/> Rarely<br>or never | <input type="checkbox"/> A few times per<br>week: _____ | <input type="checkbox"/> Once<br>per day | <input type="checkbox"/> More than once<br>per day:<br>_____ |
| <b>Other milks (almond,<br/>rice, hemp, coconut,<br/>cashew, etc.)</b>    | <input type="checkbox"/> Rarely<br>or never | <input type="checkbox"/> A few times per<br>week: _____ | <input type="checkbox"/> Once<br>per day | <input type="checkbox"/> More than once<br>per day:<br>_____ |

9. If you drink soy milk or other milk (such as almond, rice, hemp, coconut, cashew, etc.), has **sugar been added**?

No                       Yes                       Don't know                       Not applicable

10. If you drink soy milk or other milk (such as almond, rice, hemp, coconut, cashew, etc.), has it been fortified with **vitamins and minerals**?

No                       Yes                       Don't know                       Not applicable

11. When do you usually have **milk** (any of the types mentioned above)? (Check all that apply)

Breakfast                       Lunch                       Evening meal  
 Morning snack                       Afternoon snack                       Evening snack  
 Other times (please specify): \_\_\_\_\_  Rarely or never

12. How often do you usually eat **cheese or yogurt** (made from cow's or goat's milk, **not** soy or other ingredients)? (Please specify a number if indicated)

|                          |                                             |                                                         |                                          |                                                              |
|--------------------------|---------------------------------------------|---------------------------------------------------------|------------------------------------------|--------------------------------------------------------------|
| <b>Cheese (any type)</b> | <input type="checkbox"/> Rarely<br>or never | <input type="checkbox"/> A few times per<br>week: _____ | <input type="checkbox"/> Once<br>per day | <input type="checkbox"/> More than once<br>per day:<br>_____ |
|--------------------------|---------------------------------------------|---------------------------------------------------------|------------------------------------------|--------------------------------------------------------------|

**Yogurt (regular or Greek):**

**Plain, no added sugar or artificially sweetened**       Rarely or never       A few times per week: \_\_\_\_\_       Once per day       More than once per day: \_\_\_\_\_

**Sugar sweetened**       Rarely or never       A few times per week: \_\_\_\_\_       Once per day       More than once per day: \_\_\_\_\_

13. When do you usually have cheese or yogurt (**only** the types listed above)? (Check all that apply)

- Breakfast
- Morning snack
- Other times (please specify): \_\_\_\_\_
- Lunch
- Afternoon snack
- Evening meal
- Evening snack
- Rarely or never

14. Do you have any questions or concerns about food and dental cavities?     No     Yes - please list:

---

---

---

15. For those answering on behalf of a child **only** – does the child use either of the following?

Bottle:       No     Yes – what drinks is this used for? (Please list) \_\_\_\_\_

Sippy cup:     No     Yes – what drinks is this used for? (Please list) \_\_\_\_\_

Not applicable
